# Supplementary material
Source: publisher figshare collection journal article supplement (https://frontiersin.figshare.com/ndownloader/files/24441242)
Supplement: Supplementary file [file 24441242]

Table S1. Datasets collected in this study

| Species                | SRA<br>accession | Type | Tissues    | development<br>stage | # of<br>Bases | Reference link                                                                                                                                    |
|------------------------|------------------|------|------------|----------------------|---------------|---------------------------------------------------------------------------------------------------------------------------------------------------|
| <i>A. thaliana</i>     | SRP073602        | DNA  | leaves     | mature               | 109.5G        | <a href="https://www.ncbi.nlm.nih.gov/genome/?term=Arabidopsis+thaliana">https://www.ncbi.nlm.nih.gov/genome/?term=Arabidopsis+thaliana</a>       |
|                        | SRP159040        | RNA  | leaves     | 65 days              | 283M          |                                                                                                                                                   |
| <i>C. elegans</i>      | SRP186435        | DNA  | whole worm | mixed-stage          | 62.7 G        | <a href="https://www.ncbi.nlm.nih.gov/genome/?term=Caenorhabditis+elegans">https://www.ncbi.nlm.nih.gov/genome/?term=Caenorhabditis+elegans</a>   |
|                        | SRP186435        | RNA  | whole worm | mixed-stage          | 3.1G          |                                                                                                                                                   |
| <i>D. melanogaster</i> | SRP126018        | DNA  | Body       | Adult                | 56.7G         | <a href="https://www.ncbi.nlm.nih.gov/genome/?term=Drosophila+melanogaster">https://www.ncbi.nlm.nih.gov/genome/?term=Drosophila+melanogaster</a> |
|                        | SRP171981        | RNA  | Body       | Adult                | 6.1G          |                                                                                                                                                   |
| <i>H. sapiens</i>      | SRP068953        | DNA  | blood      | 40                   | 2085.6 G      | <a href="https://www.ncbi.nlm.nih.gov/genome/?term=Homo+sapiens">https://www.ncbi.nlm.nih.gov/genome/?term=Homo+sapiens</a>                       |
|                        | SRP068953        | RNA  | blood      | 40                   | 38.8G         |                                                                                                                                                   |

Table S2. The threshold of gene length for grouping lncRNA and protein-coding genes.

| Species                | lncRNA genes length<br>(x100 bp) |         |        | Protein-coding genes length<br>(x100 bp) |         |         |        |
|------------------------|----------------------------------|---------|--------|------------------------------------------|---------|---------|--------|
|                        | Group1                           | Group2  | Group3 | Group1                                   | Group2  | Group3  | Group4 |
| <i>A. thaliana</i>     | <5                               | 5~10    | >10    | <10                                      | 10~20   | 20~30   | >30    |
| <i>C. elegans</i>      | <10                              | 10~20   | >20    | <10                                      | 10~20   | 20~30   | >30    |
| <i>D. melanogaster</i> | <10                              | 10~20   | >20    | <20                                      | 20~40   | 40~60   | >60    |
| <i>H. sapiens</i>      | <100                             | 100~200 | >200   | <150                                     | 150~300 | 300~450 | >450   |

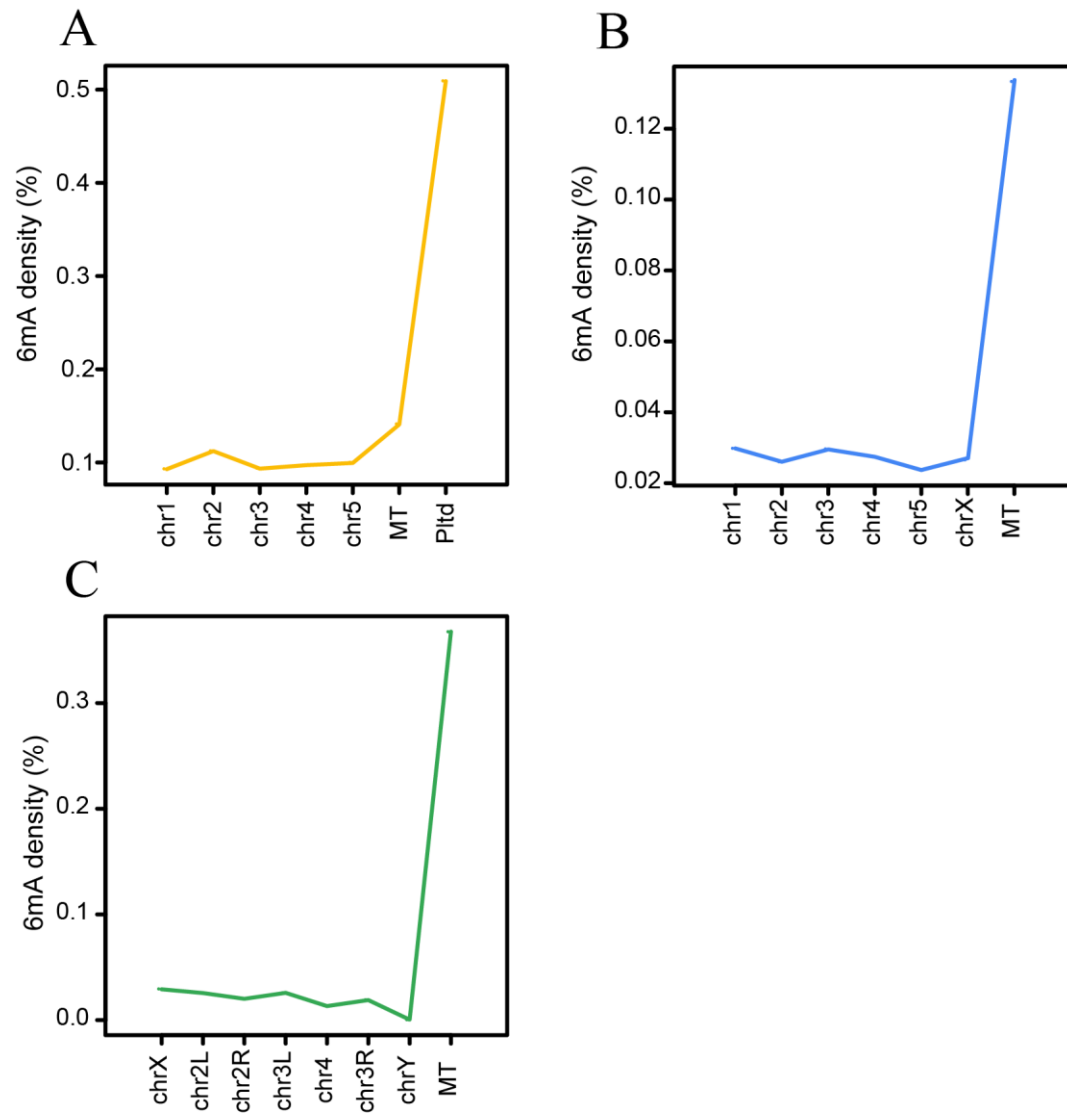

**Figure S1.** Distribution of N6-methyladenosine modification (6mA) in three species genomic DNA. (A) Line diagram of 6mA modification density in *A. thaliana* genome. (B) Line diagram of 6mA modification density in *C. elegans* genome. (C) Line diagram of 6mA modification density in *D. melanogaster* genome.

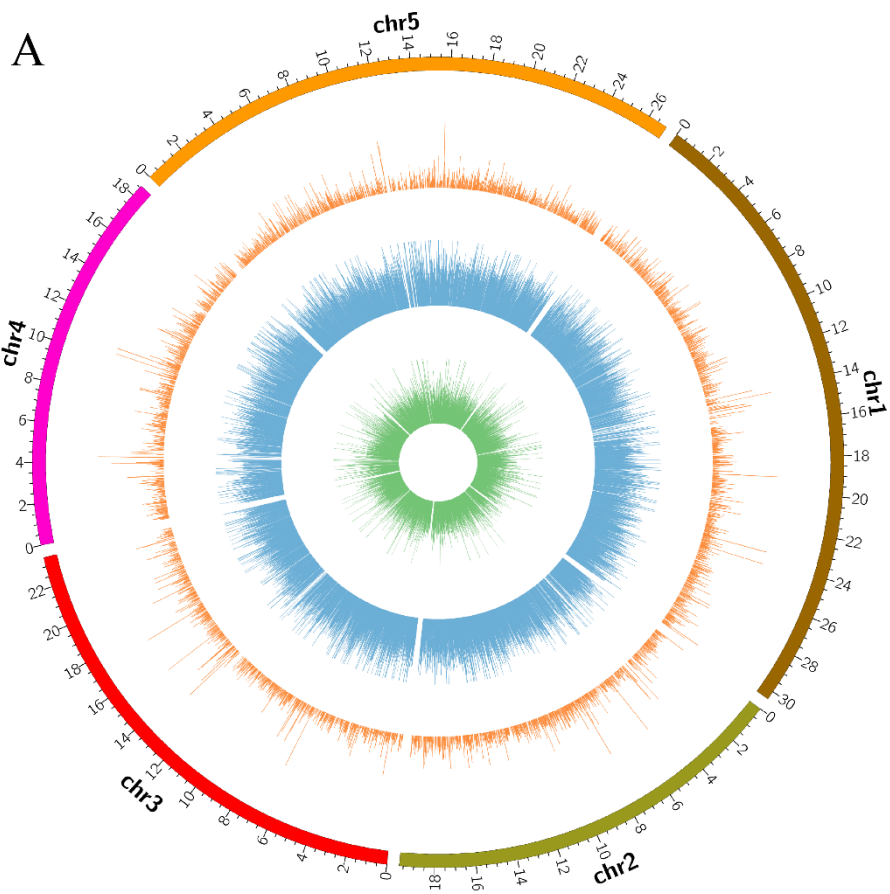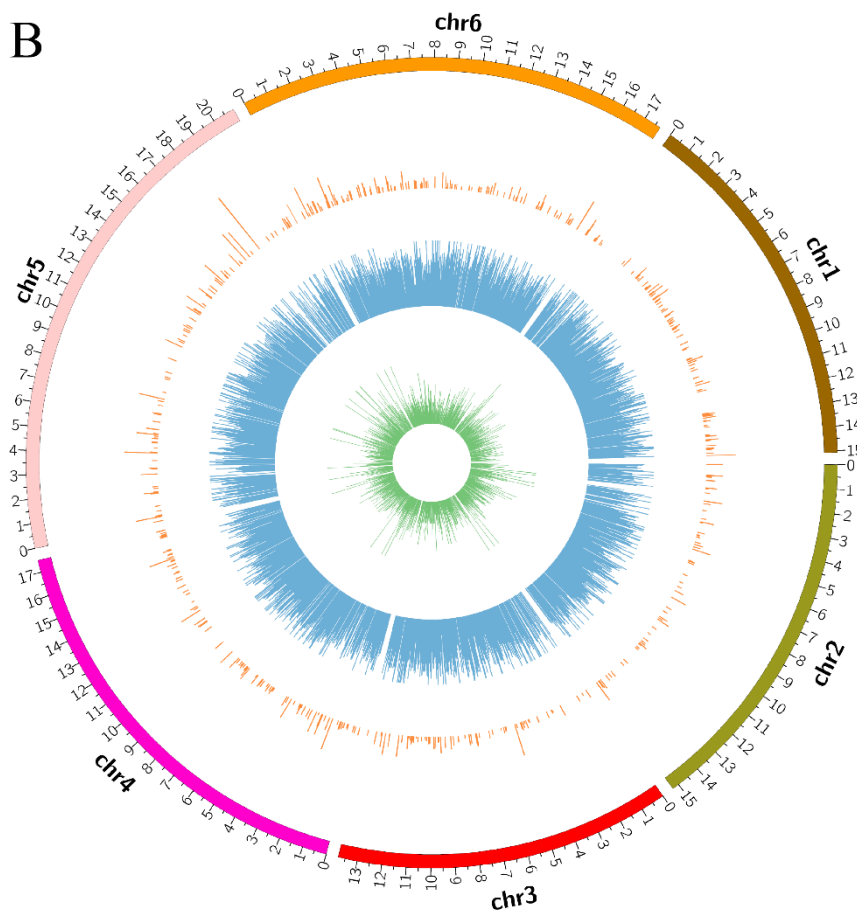

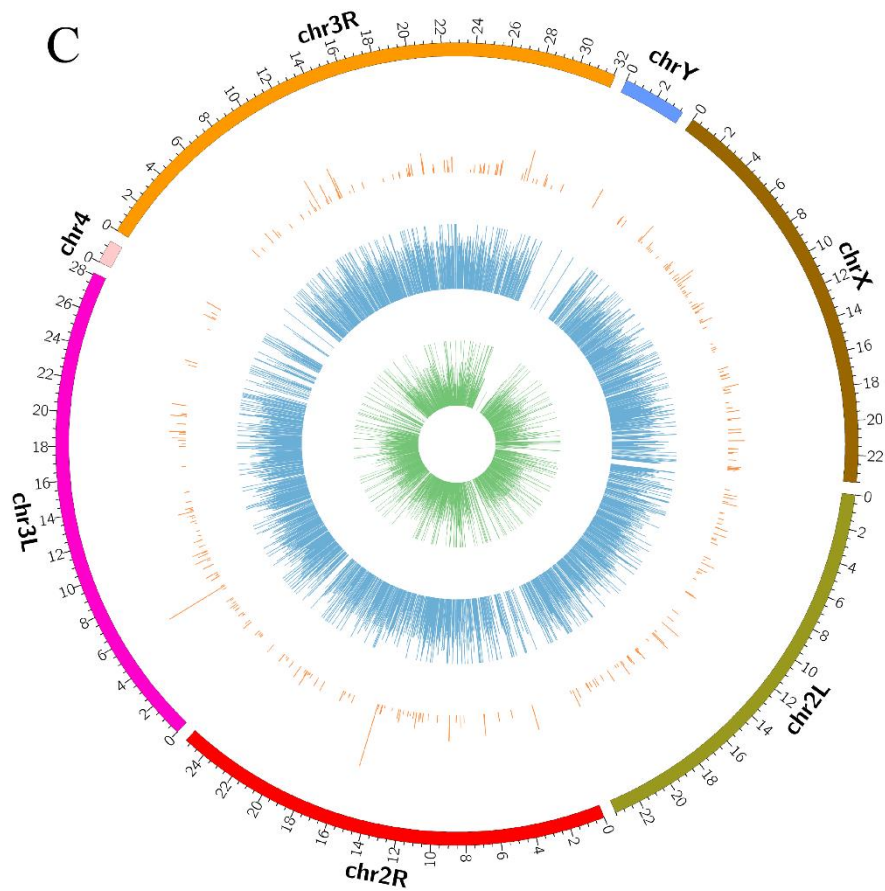

**Figure S2.** Distribution of N6-methyladenosine modification (6mA) in three species genomic DNA. (A) Circos plots of 6mA DNA methylation profiles of *A. thaliana*. (B) Circos plots of 6mA DNA methylation profiles of *C. elegans*. (C) Circos plots of 6mA DNA methylation profiles of *D. melanogaster*. (Green ring: lowly methylated (0–30%) 6mA. Blue ring: moderately methylated (30–70%) 6mA. Orange ring: highly methylated (70–100%) 6mA.)

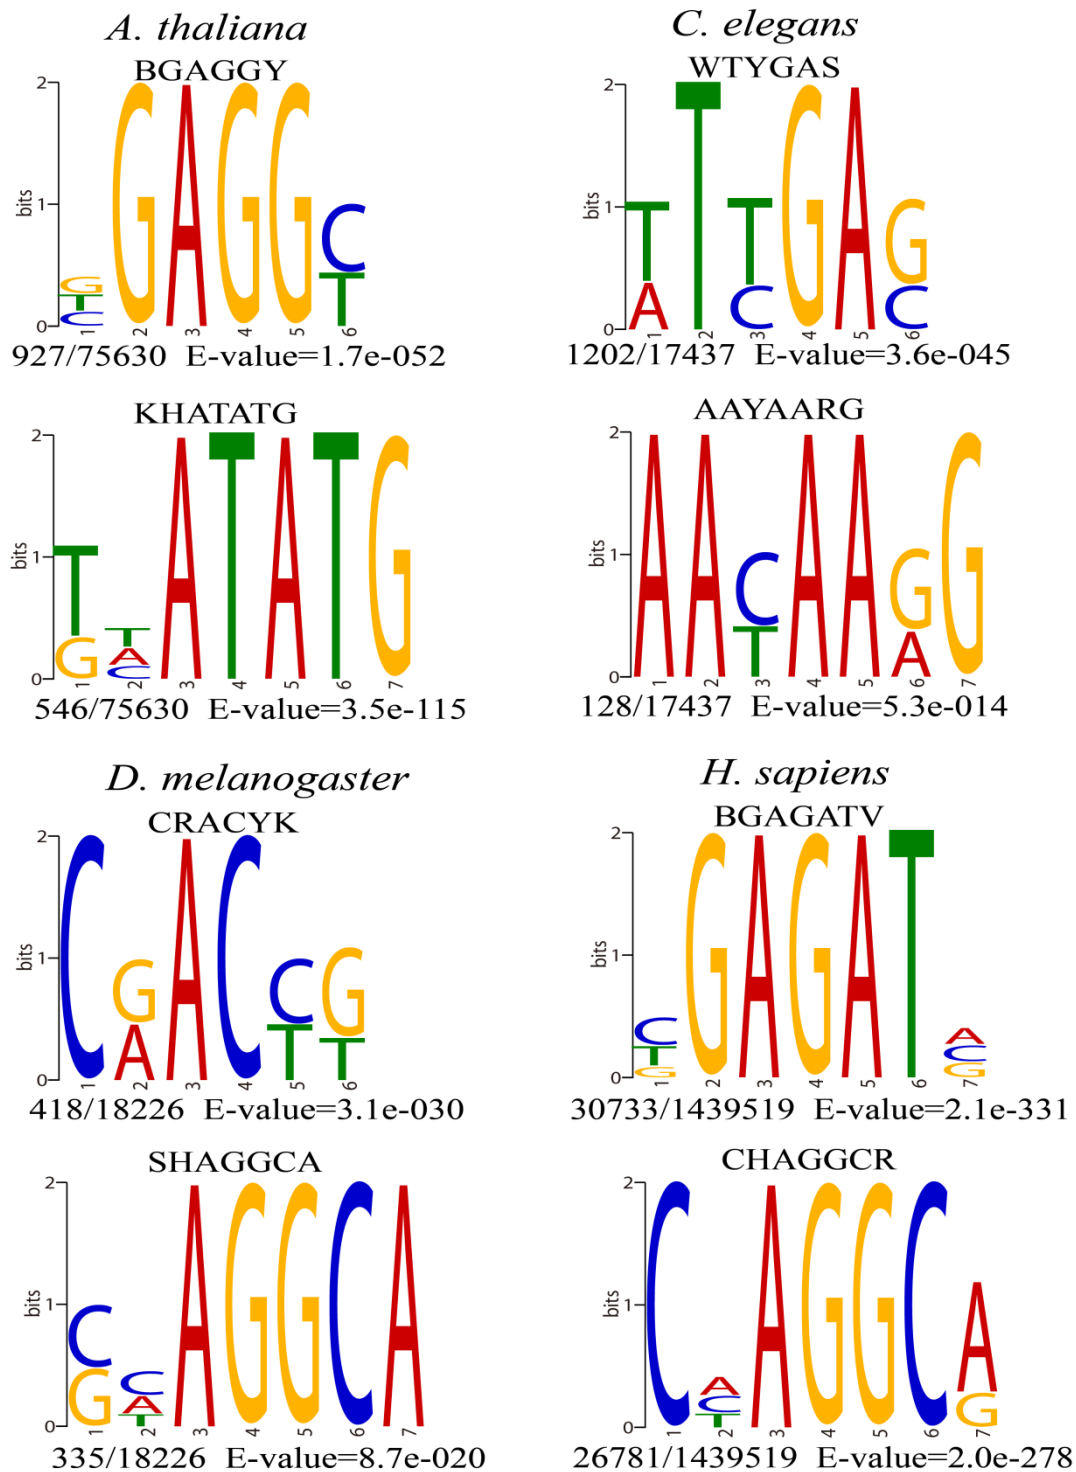

**Figure S3.** The identified consensus motifs containing 6mA sites in four species. (The number of occurrences of each motif relative to the total number of 6mA-containing motifs and the corresponding E-value generated by DREME are shown under the sequence logo.)

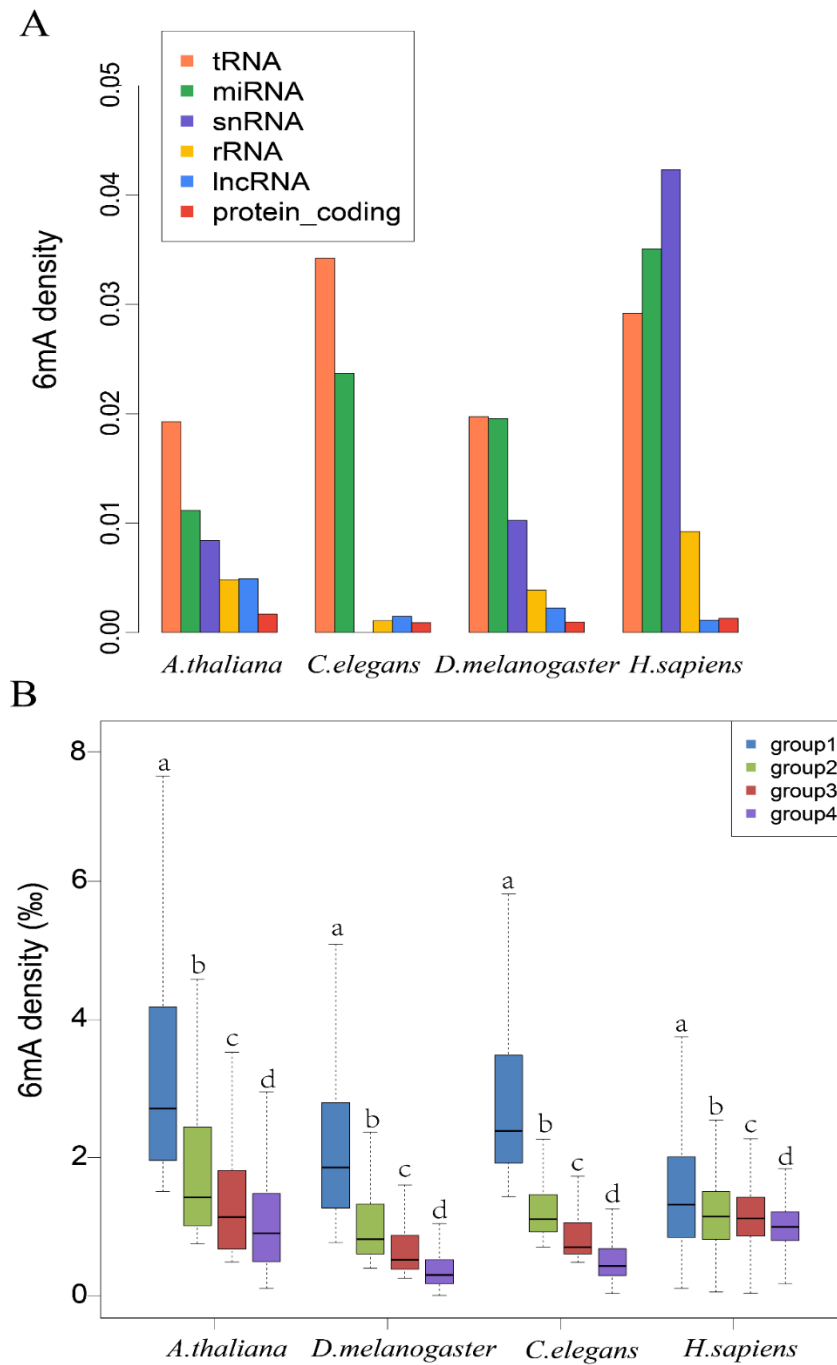

**Figure S4.** Distribution pattern of 6mA modification in non-coding genes in four species. (A) The percentages of genes containing 6mA modification in different gene categories were shown in histogram. (B) The 6mA density of different protein-coding gene length groups was shown in boxplot. The different letters shown above the box meant the significant difference in statistical analysis.

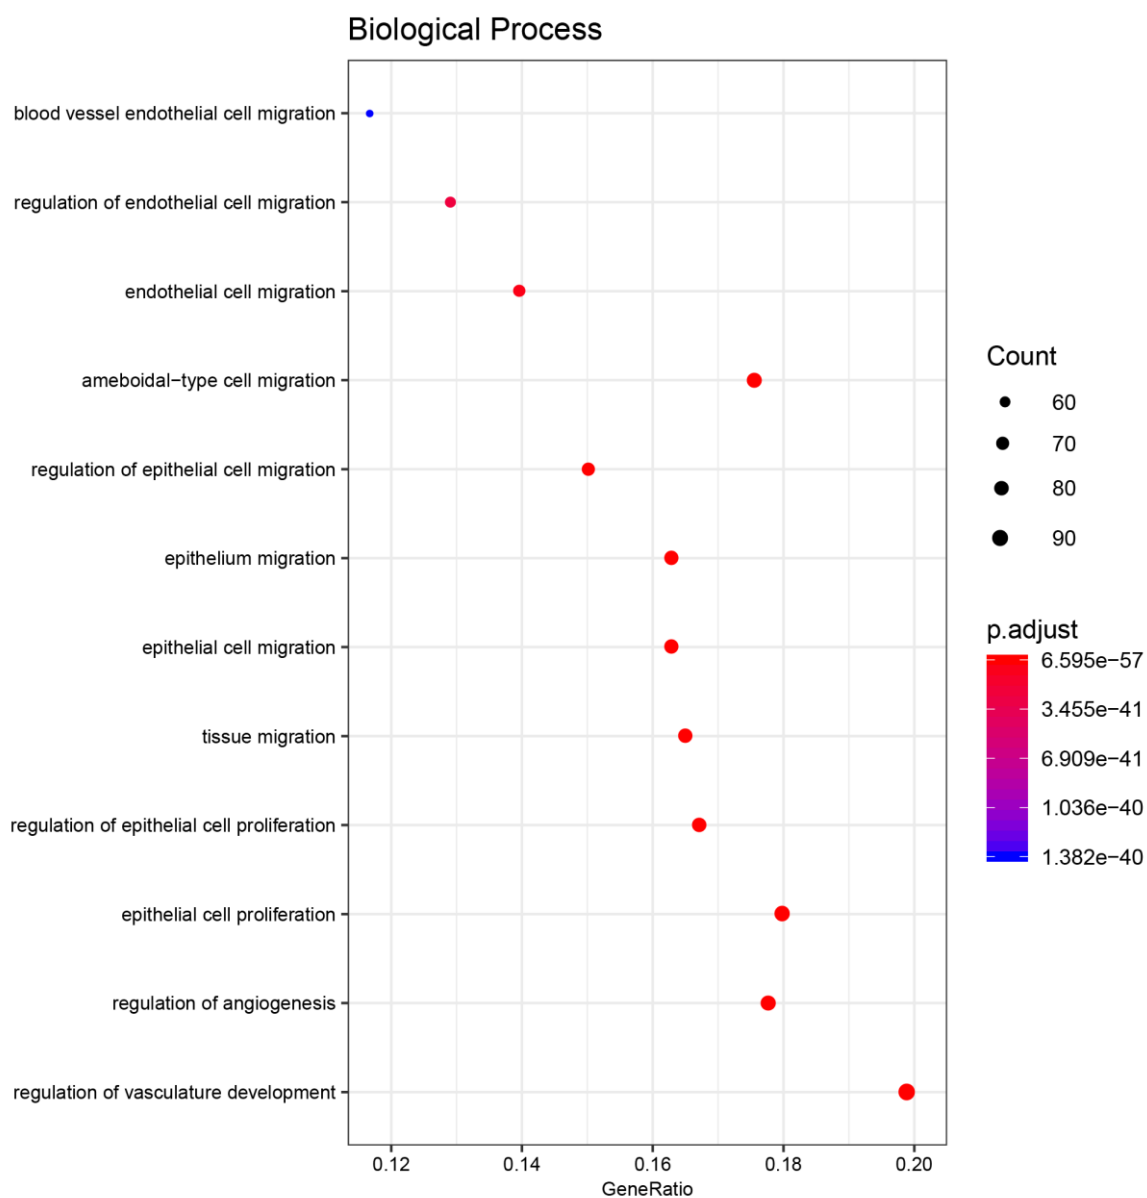

**Figure S5.** GO enrichment category of 6mA-methylated lncRNA target genes in biological process in *H. sapiens*. (P-values were adjusted by the Benjamini and Hochberg's approach, the GO category was listed with the adjusted P-value (FDR) <0.05.)
